# Supplementary material for: Characterization of the Genomic Architecture and Mutational Spectrum of a Small Cell Prostate Carcinoma
Source: MDPI journal article supplement (doi:10.3390/genes5020366), 2014-05-12
Supplement: s1 [file s1]

## Supplementary Information

**Table S1.** Likely passenger genes with somatic mutations ranked according to the percent of variant reads per site. Condel scores are indicated as deleterious (D) or neutral (N) with the computed score.

| Chr | Position      | Gene     | CN   | EXC  | LOH | Ref | SNV       | % Var | Condel Score     | Protein Change                | Ingenuity Assessment | Gene Description                                                       |
|-----|---------------|----------|------|------|-----|-----|-----------|-------|------------------|-------------------------------|----------------------|------------------------------------------------------------------------|
| 3   | 11,300,889    | HRH1     | 1.87 | 1.68 | NO  | C   | T         | 0.60  | D(0.99)          | R56W                          | Likely Pathogenic    | Histamine Receptor H1                                                  |
| 16  | 87,723,471    | JPH3     | 1.58 | 1.21 | YES | C   | A         | 0.88  | STOP GAIN        | S502*                         | Uncertain            | Junctophilin 3                                                         |
| 12  | 129,180,383   | TMEM132C | 2.25 | 2.58 | NO  | G   | A         | 0.58  | D(0.51)          | R171H, R555H                  | Not flagged          | Transmembrane protein 132C                                             |
| 19  | 40,730,438    | CNTD2    | 2.00 | 2.10 | NO  | C   | A         | 0.51  | D(0.95–0.99)     | C127F, C157F, C51F            | Not flagged          | Cyclin N-terminal domain containing 2                                  |
| 1   | 62,190,653    | TM2D1    | 2.08 | 2.23 | NO  | T   | G         | 0.50  | N(0.01)          | K47T                          | Uncertain            | TM2 domain containing 1                                                |
| 19  | 20,807,802    | ZNF626   | 2.00 | 2.10 | NO  | A   | C         | 0.48  | D(0.89–1.0)      | F294C                         | Likely Pathogenic    | Zinc finger protein 626                                                |
| 4   | 52,861,657    | LRRC66   | 2.07 | 2.15 | NO  | T   | C         | 0.46  | N(0)             | R511G                         | Uncertain            | Leucine rich repeat containing 66                                      |
| 19  | 14,710,851    | CLEC17A  | 1.85 | 2.00 | NO  | C   | T         | 0.44  | STOP GAIN        | R251*, R234*                  | Not flagged          | C-type lectin domain family 17, member A                               |
| 17  | 42,288,264–86 | UBTF     | 2.01 | 2.17 | NO  |     | 22 bp del | 0.32  | Frameshift       | S412fs                        | Uncertain            | Upstream binding transcription factor, RNA polymerase I                |
| 11  | 124,266,700   | OR8B3    | 1.85 | 1.65 | NO  | G   | A         | 0.28  | D(0.97)          | P183L                         | Not flagged          | Olfactory receptor, family 8, subfamily B member 8                     |
| 22  | 29,445,317    | ZNRF3    | 1.82 | 1.69 | NO  | C   | T         | 0.28  | D(0.84)          | T383M, T283M                  | Uncertain            | Zinc and ring finger 3                                                 |
| 20  | 36,948,603    | BPI      | 2.03 | 2.17 | NO  | C   | A         | 0.26  | N(0.22)          | S232Y                         | Uncertain            | Bactericidal/permeability-increasing protein                           |
| 19  | 58,797,099    | ZNF8     | 2.00 | 2.01 | NO  | G   | A         | 0.25  | D(0.81)          | R28Q                          | Likely Pathogenic    | Zinc finger protein 8                                                  |
| 15  | 41,820,531    | RPAP1    | 1.57 | 1.23 | YES | C   | A         | 0.23  | D(0.5)           | A388S                         | Not flagged          | RNA polymerase II associated protein 1                                 |
| 3   | 148,904,325   | CP       | 1.87 | 1.71 | NO  | T   | G         | 0.23  | D(0.91), N(0.05) | M687L, M470L                  | Likely Pathogenic    | Ceruloplasmin (ferroxidase)                                            |
| 19  | 49,227,680    | RASIP1   | 2.00 | 2.14 | NO  | C   | A         | 0.19  | D(0.97)          | G820W                         | Not flagged          | Ras interacting protein 1                                              |
| 6   | 71,238,129    | FAM135A  | 2.23 | 2.86 | NO  | T   | C         | 0.16  | D(0.89–0.99)     | L1037P, L1054P, L1250P, L830P | Likely Pathogenic    | Family with sequence similarity 135, member A                          |
| 12  | 307,151       | SLC6A12  | 2.16 | 2.53 | NO  | T   | C         | 0.15  | D(0.62–0.82)     | T289A                         | Not flagged          | Solute carrier family 6 (neurotransmitter transporter/GABA), member 12 |

**Table S1.** *Cont.*

| Chr | Position    | Gene    | CN   | EXC  | LOH | Ref | SNV | % Var | Condel Score                    | Protein Change            | Ingenuity Assessment | Gene Description                      |
|-----|-------------|---------|------|------|-----|-----|-----|-------|---------------------------------|---------------------------|----------------------|---------------------------------------|
| 2   | 112,813,281 | TMEM87B | 1.89 | 1.70 | NO  | C   | A   | 0.13  | D(0.79)                         | A38E                      | Not flagged          | Transmembrane protein 87B             |
| 7   | 100,243,891 | ACTL6B  | 1.86 | 1.65 | NO  | C   | T   | 0.05  | D(1.0)                          | G394D                     | Not flagged          | Actin-like 6B                         |
| 20  | 43,739,136  | WFDC5   | 2.03 | 2.17 | NO  | G   | T   | 0.04  | D(0.5–0.84)                     | P91H                      | Not flagged          | WAP four-disulfide core domain 5      |
| 10  | 81,058,910  | ZMIZ1   | 2.05 | 2.13 | NO  | C   | A   | 0.04  | D(0.83–0.85)                    | F590L                     | Not flagged          | Zinc finger, MIZ-type containing 1    |
| 17  | 76,433,731  | DNH17   | 2.02 | 2.18 | NO  | A   | T   | 0.04  | D(0.85),<br>D(0.95),<br>N(0.05) | F4003I, F4004I,<br>F1210I | Not flagged          | Dynein, axonemal, heavy chain 17      |
| 18  | 28,986,048  | DSG4    | 1.87 | 1.71 | NO  | G   | A   | 0.03  | D(0.81)                         | A549T                     | Not flagged          | Desmoglein 4                          |
| 1   | 52,861,802  | ORC1    | 2.08 | 2.18 | NO  | C   | A   | 0.03  | STOP GAIN                       | E213*                     | Not flagged          | Origin recognition complex, subunit 1 |
| 6   | 147,636,696 | STXBP5  | 2.23 | 2.48 | NO  | A   | T   | 0.02  | D(0.82–0.90)                    | E154V, E483V              | Not flagged          | Syntaxin binding protein 5 (tomosyn)  |

**Table S2.** Possible inherited cancer-related risk factors ranked according to Condel D score. All positions were heterozygous.

| Chr | Position    | Gene  | Ref | SNV | Condel Score     | Protein Change | Ingenuity Assessment | Gene Description                             | Comments                                                          |
|-----|-------------|-------|-----|-----|------------------|----------------|----------------------|----------------------------------------------|-------------------------------------------------------------------|
| 5   | 140,052,407 | DND1  | G   | A   | D(0.96)          | P76L           | Likely Pathogenic    | DND microRNA-mediated repression inhibitor 1 | Increases spontaneous testicular germ cell tumors in mice         |
| 2   | 29,416,181  | ALK   | A   | G   | D(0.94), N(0.01) | L421S, L1591S  | Likely Pathogenic    | Anaplastic lymphoma receptor tyrosine kinase | Likely pathogenic, oncogenic mutations seen in neuroblastomas     |
| 6   | 1,611,642   | FOXC1 | C   | A   | D(0.92)          | P321Q          | Uncertain            | Forkhead box C1                              | High expression is associated with poor cancer prognosis          |
| 2   | 106,498,240 | NCK2  | C   | G   | D(0.91)          | P228R          | No assessment        | NCK adaptor protein 2                        | Promotes melanoma progression                                     |
| 12  | 31,254,871  | DDX11 | C   | G   | D(0.64), N(0.37) | H693Q, H719Q   | Likely Pathogenic    | DEAD/H box helicase 11                       | Required for sister chromatid cohesion; seen in advanced melanoma |
| 9   | 70,863,777  | CBWD3 | G   | T   | N(0.00)          | D132Y          | Likely Pathogenic    | CBW domain containing 6                      | Mutations observed in COSMIC database (cancer.sanger.ac.uk)       |

## Supplementary Methods: Analysis and Variant Filtering

**Figure S1.** Exome analysis pipeline used. Primary analysis was done using CIDRSeqSuite and tools from GATK. The final BAM files were submitted to Haplotype Caller for subsequent filtering or to either of two somatic variant callers (Seurat or Strelka). Interpretation of the results were determined from the Ingenuity Variant Analysis tool or from IntOGen web tool.

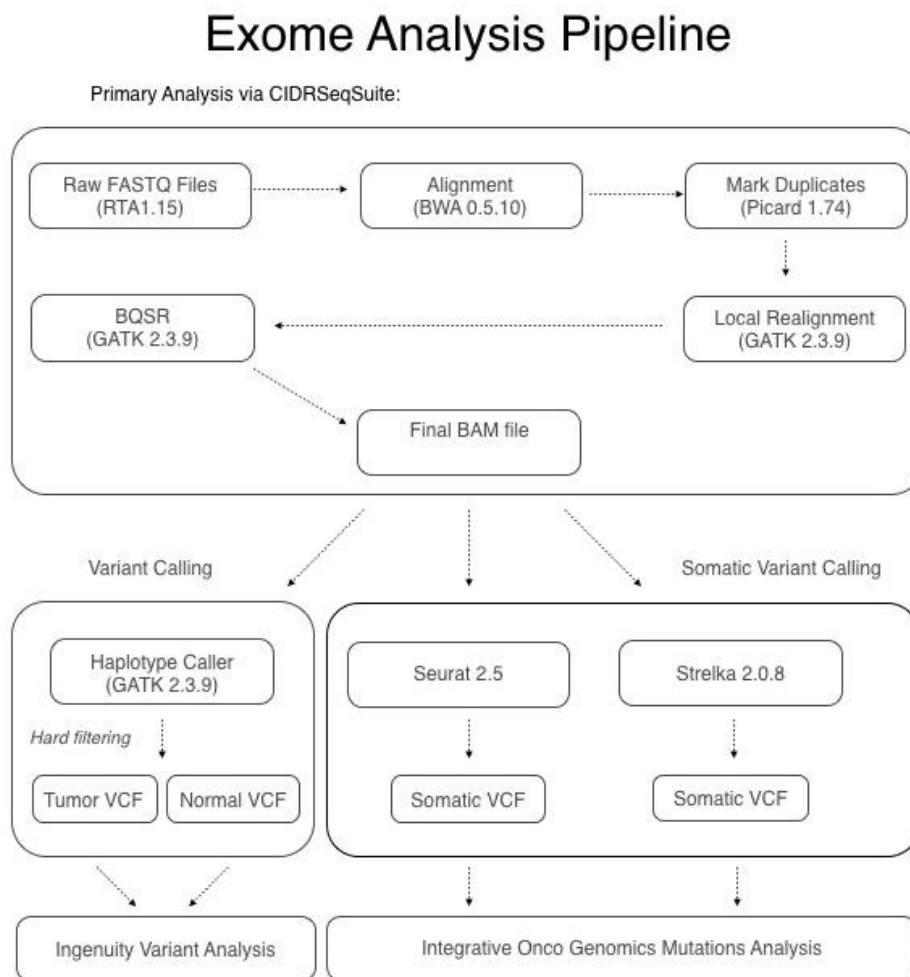

Variant detection was performed using GATK2.3.9 best practices to produce BAM files. Hard filtering of Haplotype Caller settings were as follows:

SNVs: QD < 2.0, FS > 60.0, MQ < 4.0, HaplotypeScore > 13.0, MappingQualityRankSum < -12.5, ReadPosSum < -8.0; for Indels: QD < 2.0, FS > 200.0, ReadPosRankSum < -20.0.

Seurat 2.5 was run under default parameters.

Strelka 2.0.8 parameters:

isSkipDepthFilters = 1

maxInputDepth = 10000

depthFilterMultiple = 3.0

snvMaxFilteredBasecallFrac = 0.4

```

snvMaxSpanningDeletionFrac = 0.75
indelMaxRefRepeat = 8
indelMaxWindowFilteredBasecallFrac = 0.3
indelMaxIntHpolLength = 14 ssnvPrior = 0.000001
sindelPrior = 0.000001
ssnvNoise = 0.0000005
sindelNoise = 0.000001
ssnvNoiseStrandBiasFrac = 0.5
minTier1Mapq = 20
minTier2Mapq = 5
ssnvQuality_LowerBound = 15
sindelQuality_LowerBound = 30
isWriteRealignedBam = 0
binSize = 25000000

```

**Ingenuity Variant Analysis parameters** (<http://variants.ingenuity.com/Scott-etal-2014>):

The Ingenuity filtering was selected for increased sensitivity as opposed to maximum specificity. All SNVs listed in the Tables were visually inspected within IGV.

**Filter Description:**

Starting with 48248 variants spanning 13331 genes, variants were:

Kept with call quality at least 20.0 in cases or at least 20.0 in controls; excluded that are observed with an allele frequency greater than or equal to 3.0% of the genomes in the 1000 genomes project OR greater than or equal to 3.0% of the public Complete Genomics genomes OR greater than or equal to 3.0% of the NHLBI ESP exomes (All) kept that are experimentally observed to be associated with a phenotype: Pathogenic, Possibly Pathogenic OR Frameshift, in-frame indel, or stop codon change OR Missense.

Kept which are associated with gain of function OR heterozygous OR hemizygous OR homozygous OR nullizygous OR compound\_heterozygous OR haploinsufficient AND occur in at least 1 of the case samples at the variant level in the Case samples AND not which are associated with gain of function OR hemizygous OR homozygous OR compound\_heterozygous OR haploinsufficient AND occur in at least 1 of the control samples at the variant level in the Control Samples in at least 1 of the matched samples at variant level kept that are found in cancer-associated mouse knockout phenotypes OR cancer-associated cellular processes with appropriate directionality OR cancer-associated pathways with appropriate directionality OR cancer therapeutic targets OR published cancer literature variant and gene level findings OR TCGA at a frequency greater than or equal to 0.01% AND involved in: any cancer kept that are within 2 hops upstream and that are known or predicted to affect: prostate cancer or diseases consistent with these phenotypes.

Ingenuity Variant Analysis version 2.4.20140114.

Content versions: Ingenuity Knowledge Base (Zosma\_131203.000), COSMIC (v67), dbSNP (Build 138 (08/09/2013)), 1000 Genome Frequency (v3), TargetScan (v6.2), EVS (ESP6500 0.0.21), JASPAR (10/12/2009), PhyloP hg18 (11/2009), PhyloP hg19 (01/2009), Vista Enhancer hg18. (10/27/2007), Vista Enhancer hg19 (12/26/2010), CGI Genomes (11/2011), SIFT (01/2013), BSIFT (01/2013), TCGA (09/05/2013), PolyPhen-2 (HumVar Training set 2011\_12), Clinvar (10/01/2013).

**Ingenuity Variant Analysis parameters** (stricter filtering; <https://variants.ingenuity.com/Scott2014ver2>):

## Filter Description:

Starting with 48248 variants spanning 13331 genes, variants were:

Kept with call quality at least 1.0 in cases or at least 1.0 in controls; excluded that are observed with an allele frequency greater than or equal to 0.0010% of the genomes in the 1000 genomes project OR greater than or equal to 0.0010% of the public Complete Genomics genomes OR greater than or equal to 0.0010% of the NHLBI ESP exomes (All).

Kept that are experimentally observed to be associated with a phenotype: Pathogenic, Possibly Pathogenic, Unknown Significance OR established gain of function in the literature OR gene fusions OR inferred activating mutations by Ingenuity OR predicted gain of function by BSIFT OR in a microRNA binding site OR in copy number gain genes OR Frameshift, in-frame indel, or stop codon change OR Missense OR disrupt splice site upto 2.0 bases into intron OR deleterious to a microRNA OR structural variant OR in promoter binding site OR in enhancer OR in evolutionary-conserved region with a phyloP *p*-value of less than or equal to 1.0E-6.

Kept which are associated with gain of function OR hemizygous OR haploinsufficient OR heterozygous OR heterozygous\_alt OR heterozygous\_amb OR compound\_heterozygous OR nullizygous OR homozygous AND occur in at least 1 of the case samples at the variant level in the Case samples AND not which are associated with gain of function OR hemizygous OR haploinsufficient OR heterozygous OR heterozygous\_alt OR heterozygous\_amb OR compound\_heterozygous OR homozygous AND occur in at least 1 of the control samples at the variant level in the Control Samples in atleast 1 of the matched samples at variant level.

Kept that are found in cancer-associated mouse knockout phenotypes OR cancer-associated cellular processes with appropriate directionality OR cancer-associated pathways with appropriate directionality OR cancer therapeutic targets OR published cancer literature variant and gene level findings OR known or predicted cancer subnetwork regulatory sites OR COSMIC at a frequency greater than or equal to 0.01% OR TCGA at a frequency greater than or equal to 0.01% AND involved in: any cancer.

Kept that are within 1 hop upstream and that are known or predicted to affect: small cell adenocarcinoma, castration-refractory prostate cancer (castration refractory prostate cancer process), prostate cancer, metastases or diseases consistent with these phenotypes.

Ingenuity Variant Analysis version 2.4.20140207.

Content versions: Ingenuity Knowledge Base (Zosma\_131203.000), COSMIC (v67), dbSNP (Build 138 (08/09/2013)), 1000 Genome Frequency (v3), TargetScan (v6.2), EVS (ESP6500 0.0.21), JASPAR (10/12/2009), PhyloP hg18 (11/2009), PhyloP hg19 (01/2009), Vista Enhancer hg18 (10/27/2007), Vista Enhancer hg19 (12/26/2010), CGI Genomes (11/2011), SIFT (01/2013), BSIFT (01/2013), TCGA (09/05/2013), PolyPhen-2 (HumVar Training set 2011\_12), Clinvar (10/01/2013).

© 2014 by the authors; licensee MDPI, Basel, Switzerland. This article is an open access article distributed under the terms and conditions of the Creative Commons Attribution license (<http://creativecommons.org/licenses/by/3.0/>).
